# Supplementary material for: Information Channels and Knowledge of Coronavirus Disease 2019 among Vietnamese/Nepalese Students in Japan: A Cross-Sectional Study
Source: Research Square preprint supplement (doi:10.21203/rs.3.rs-7569187/v1), 2025-09-25
Supplement: Supplementary file 1 [file 9eed0c95c0c47994a50a0ef6.xlsx]

## Sheet: research data
ID	answerdate	age	sex	country	area	arrival month in Japan	marital status	educational level	japanese proficiency	monthly income	self-rated health	health insurance	had hoped to see a doctor	unmet healthcare needs	social media	social media credibility	poster	knowledge score
1	2022-01-31 17:02:00	21	1	1	3	11/2020	2	3	3	2	3	1	1	1	4	3	1	19
2	2022-01-31 23:59:00	24	1	1	3	11/2020	2	3	4	3	3	1	1	2	4	2	1	20
3	2022-02-01 10:24:00	20	1	1	3	11/2019	2	3	2	2	2	1	1	2	4	2	1	20
5	2022-02-01 11:07:00	22	2	1	1	3/2020	2	1	2	3	3	1	2	*	4	2	2	20
6	2022-02-01 11:10:00	23	1	1	1	12/2021	2	3	3	1	2	1	1	2	4	1	1	15
7	2022-02-01 11:10:00	27	2	1	1	12/2020	2	5	2	3	3	1	2	*	4	1	2	12
8	2022-02-01 11:12:00	21	2	1	1	3/2020	2	3	2	3	3	1	1	2	4	2	1	20
9	2022-02-01 12:09:00	20	1	1	1	4/2020	2	3	3	2	1	1	2	*	4	1	1	20
10	2022-02-01 12:17:00	22	2	1	1	3/2020	2	3	2	2	2	1	1	1	4	1	1	15
12	2022-02-02 00:44:00	20	2	1	1	11/2020	2	3	4	1	3	1	1	1	4	1	1	17
17	2022-02-02 12:53:00	20	2	1	1	3/2020	2	3	3	3	3	1	1	2	4	1	1	18
18	2022-02-02 12:53:00	30	1	1	1	4/2020	2	1	5	2	1	1	1	2	4	1	2	12
19	2022-02-02 12:53:00	21	2	1	1	4/2019	2	3	3	2	3	1	1	1	7	1	1	15
20	2022-02-02 12:54:00	21	2	1	1	3/2020	2	3	3	3	2	1	2	*	4	2	1	14
21	2022-02-02 12:54:00	22	2	1	1	3/2020	2	3	3	3	2	1	2	*	4	2	1	14
22	2022-02-02 12:55:00	27	1	1	1	12/2021	2	3	3	2	1	1	1	2	2	1	1	16
23	2022-02-02 12:57:00	24	1	1	1	12/2021	2	3	2	3	2	1	2	*	4	1	1	19
24	2022-02-02 12:58:00	21	1	1	1	4/2020	2	3	2	3	3	1	2	*	4	1	1	11
28	2022-02-03 13:35:00	21	2	1	1	12/2020	2	3	3	2	2	1	1	2	4	3	1	21
30	2022-02-03 15:48:00	21	2	1	1	11/2020	2	3	3	4	3	1	1	2	4	3	1	18
31	2022-02-03 15:52:00	21	2	1	1	11/2020	2	3	3	3	3	2	2	*	4	1	1	20
32	2022-02-03 16:05:00	21	1	1	1	11/2020	2	3	3	2	2	1	1	2	4	3	1	20
33	2022-02-03 16:58:00	23	2	1	1	11/2020	2	4	3	2	3	1	1	1	4	3	2	20
34	2022-02-03 17:21:00	20	2	1	1	11/2020	2	3	2	1	2	1	1	2	2	2	1	17
35	2022-02-03 17:49:00	21	1	1	1	11/2019	2	4	2	2	1	1	2	*	4	1	1	20
36	2022-02-03 20:30:00	20	2	1	1	11/2020	2	3	2	2	3	1	1	1	4	1	1	17
41	2022-02-04 12:02:00	23	2	1	1	12/2020	2	4	4	2	3	1	1	1	4	1	1	18
42	2022-02-04 13:02:00	20	2	1	1	3/2020	2	3	3	3	3	1	2	*	4	1	1	17
44	2022-02-06 14:57:00	22	1	1	2	11/2020	2	3	3	2	2	1	2	*	7	1	2	21
45	2022-02-06 20:10:00	20	2	1	1	11/2020	2	3	4	3	3	1	1	2	4	3	1	20
46	2022-02-07 11:14:00	21	2	1	2	11/2020	2	3	3	2	3	1	1	2	4	1	1	18
48	2022-02-07 11:33:00	21	1	1	2	11/2019	2	3	2	2	2	1	2	*	4	1	2	20
49	2022-02-08 21:38:00	20	2	1	2	11/2020	2	3	4	2	3	1	1	2	4	1	1	19
52	2022-02-10 11:49:00	20	1	1	2	10/2020	2	3	3	3	2	1	2	*	4	1	2	19
53	2022-02-10 11:50:00	21	1	1	2	11/2020	2	3	3	3	3	1	2	*	4	1	1	19
54	2022-02-10 11:51:00	27	1	1	2	11/2020	2	4	3	3	1	1	2	*	4	2	1	21
55	2022-02-10 11:52:00	23	1	1	2	11/2020	2	3	3	3	2	1	1	2	4	1	1	16
56	2022-02-10 11:52:00	21	1	1	2	11/2020	2	3	3	3	3	1	2	*	4	1	1	21
57	2022-02-10 11:52:00	21	2	1	2	11/2020	2	3	4	3	3	1	2	*	4	2	1	17
58	2022-02-10 11:52:00	20	2	1	2	11/2020	2	3	3	3	2	1	2	*	4	1	1	19
59	2022-02-10 11:53:00	23	1	1	2	11/2020	2	3	4	3	3	1	2	*	4	2	1	20
60	2022-02-10 11:53:00	20	2	1	2	10/2020	2	3	3	3	2	1	2	*	4	2	1	19
61	2022-02-10 11:53:00	21	2	1	2	11/2020	2	3	3	3	3	1	2	*	4	2	2	20
62	2022-02-10 11:53:00	20	1	1	2	11/2020	2	3	3	3	2	1	2	*	4	1	1	19
63	2022-02-10 11:56:00	20	2	1	2	11/2020	2	3	3	3	3	1	1	2	2	1	1	17
64	2022-02-10 11:57:00	23	1	1	2	11/2020	2	3	4	3	3	2	2	*	7	2	1	19
65	2022-02-10 11:57:00	21	1	1	2	11/2020	2	3	5	3	2	1	2	*	4	1	2	19
66	2022-02-10 11:58:00	20	1	1	2	11/2020	2	3	4	3	2	1	2	*	7	2	1	15
67	2022-02-10 14:17:00	20	1	1	2	11/2020	2	3	3	2	3	2	2	*	4	2	1	19
68	2022-02-10 14:17:00	21	2	1	2	11/2020	2	3	3	2	2	1	2	*	7	3	1	16
69	2022-02-10 14:18:00	20	2	1	2	11/2021	2	3	3	3	3	1	1	1	4	3	2	17
70	2022-02-10 14:18:00	24	1	1	2	11/2020	2	5	3	2	3	1	2	*	4	1	1	22
71	2022-02-10 14:18:00	20	1	1	2	11/2020	2	3	3	2	2	1	2	*	7	2	1	12
72	2022-02-10 14:18:00	20	1	1	2	11/2020	2	3	3	3	2	1	1	2	4	1	1	18
73	2022-02-10 14:18:00	22	2	1	2	11/2020	2	3	2	3	3	1	1	1	4	3	2	20
74	2022-02-10 14:19:00	22	1	1	2	10/2020	2	3	4	1	3	2	2	*	4	1	2	23
75	2022-02-10 14:20:00	20	1	1	2	11/2020	2	3	3	3	1	1	1	2	2	2	2	20
76	2022-02-10 14:21:00	20	1	1	2	11/2020	2	3	3	3	2	1	2	*	4	3	1	19
77	2022-02-10 14:21:00	22	1	1	1	10/2020	2	1	3	3	2	1	1	1	4	3	1	16
78	2022-02-10 14:47:00	21	1	1	2	11/2021	2	3	3	3	3	1	2	*	8	2	1	16
79	2022-02-10 14:48:00	22	2	1	2	11/2020	2	4	4	1	1	1	1	1	8	1	1	14
80	2022-02-10 14:50:00	20	1	1	2	11/2020	2	3	4	3	3	1	1	2	4	1	1	20
81	2022-02-10 14:52:00	21	1	1	2	11/2020	2	3	4	3	3	1	2	*	4	1	1	16
82	2022-02-13 11:38:00	26	2	1	1	1/2021	2	5	4	2	3	1	1	1	4	2	2	19
83	2022-02-14 09:46:00	23	1	1	2	12/2020	2	3	3	3	2	1	1	1	4	1	1	21
84	2022-02-14 10:44:00	21	1	1	1	11/2020	2	3	3	3	2	1	2	*	4	1	1	18
86	2022-02-14 10:45:00	20	1	1	1	12/2020	2	3	3	3	3	1	2	*	4	2	1	16
87	2022-02-14 10:45:00	20	2	1	1	11/2020	2	3	4	3	3	1	2	*	8	2	2	20
88	2022-02-14 10:55:00	23	1	1	1	12/2020	2	3	4	3	3	1	1	2	7	2	1	18
91	2022-02-14 11:39:00	22	1	1	1	12/2020	2	3	4	3	2	1	1	1	4	1	1	20
92	2022-02-14 11:39:00	22	2	1	1	4/2019	2	3	3	3	3	2	1	1	4	1	1	18
93	2022-02-14 11:44:00	22	1	1	1	11/2020	2	3	3	2	2	1	1	1	4	2	1	19
94	2022-02-14 11:46:00	21	2	1	1	11/2020	2	3	4	3	3	1	2	*	4	1	1	17
95	2022-02-14 13:28:00	28	2	1	2	3/2020	2	5	2	4	2	1	1	1	1	1	1	20
96	2022-02-14 15:48:00	21	2	1	2	11/2021	2	3	3	2	2	1	1	1	4	2	1	21
97	2022-02-14 15:50:00	20	1	1	2	10/2020	2	3	3	3	2	2	2	*	4	1	2	21
99	2022-02-14 16:06:00	21	2	1	2	11/2020	2	3	3	2	2	1	2	*	4	2	1	15
100	2022-02-14 16:09:00	21	2	1	2	11/2020	2	3	3	3	3	1	1	1	4	2	1	22
101	2022-02-14 16:13:00	23	2	1	2	4/2018	2	3	3	3	2	1	1	2	7	1	1	19
103	2022-02-14 16:19:00	25	2	1	2	12/2020	2	5	3	3	3	1	1	1	4	1	1	19
104	2022-02-14 16:19:00	20	1	1	2	3/2020	2	3	3	1	3	1	1	1	4	1	1	15
105	2022-02-14 16:20:00	21	1	1	2	10/2021	2	4	3	3	2	1	2	*	4	1	1	20
106	2022-02-14 16:24:00	22	2	1	2	11/2020	2	3	4	3	2	1	2	*	4	2	1	18
107	2022-02-14 16:28:00	25	2	1	2	11/2020	2	5	3	2	3	1	2	*	4	1	1	15
108	2022-02-14 16:31:00	21	2	1	2	11/2020	2	3	2	1	2	1	1	2	4	1	1	19
109	2022-02-14 16:46:00	21	2	1	2	4/2020	2	3	2	1	1	1	2	*	4	3	1	16
110	2022-02-14 16:56:00	23	2	1	2	11/2020	2	4	4	2	2	1	2	*	6	2	1	21
112	2022-02-14 17:10:00	20	2	1	2	3/2020	2	3	2	3	2	1	1	2	7	2	1	19
113	2022-02-14 17:11:00	20	2	1	2	3/2020	2	3	2	3	1	1	1	2	8	1	1	21
114	2022-02-14 17:11:00	20	2	1	2	3/2020	2	3	3	3	3	1	1	1	7	2	1	19
115	2022-02-14 17:20:00	20	2	1	2	3/2020	2	3	2	3	2	1	1	2	8	2	1	19
116	2022-02-14 17:30:00	21	2	1	2	11/2020	1	4	3	3	3	1	1	1	1	1	1	18
117	2022-02-14 17:35:00	21	2	1	2	3/2020	2	3	3	3	3	1	1	1	4	2	2	14
118	2022-02-14 17:36:00	26	1	1	2	11/2020	2	5	2	2	3	1	1	2	4	1	2	23
121	2022-02-14 17:52:00	20	2	1	2	11/2020	2	3	3	3	3	1	1	2	8	2	2	13
122	2022-02-14 18:00:00	20	2	1	2	4/2020	2	1	4	2	3	1	1	2	7	2	2	19
123	2022-02-14 18:03:00	20	2	1	2	11/2020	2	3	3	3	3	1	1	2	4	1	2	17
124	2022-02-14 18:10:00	23	1	1	2	11/2020	2	4	3	3	1	1	1	2	4	1	1	18
126	2022-02-14 18:59:00	21	2	1	2	3/2020	2	3	3	2	2	1	1	1	4	1	1	16
127	2022-02-14 19:24:00	24	2	1	2	3/2020	2	5	2	3	3	1	1	2	7	1	2	20
128	2022-02-14 19:29:00	20	2	1	2	11/2020	2	3	2	3	2	1	1	1	4	1	2	19
129	2022-02-14 19:53:00	27	1	1	2	11/2021	2	3	3	3	2	1	2	*	4	1	2	12
131	2022-02-14 20:48:00	29	2	1	2	11/2020	2	5	4	2	2	1	1	2	8	1	1	17
132	2022-02-14 21:27:00	20	1	1	2	10/2020	2	3	3	1	3	1	1	1	3	2	2	10
133	2022-02-14 22:41:00	26	1	1	1	4/2019	2	3	3	3	2	1	1	2	4	3	1	21
134	2022-02-14 23:15:00	20	2	1	2	10/2020	2	3	3	2	2	1	2	*	4	3	1	17
135	2022-02-15 00:12:00	20	1	1	2	11/2020	2	3	3	3	2	1	2	*	4	2	1	17
136	2022-02-15 00:26:00	20	1	1	2	10/2021	2	3	3	3	2	1	2	*	7	2	1	16
137	2022-02-15 00:32:00	20	2	1	2	11/2020	2	1	4	2	3	1	1	2	7	3	2	22
139	2022-02-15 11:09:00	24	2	1	1	12/2019	2	3	4	3	3	1	1	1	4	1	2	22
140	2022-02-15 11:12:00	21	2	1	1	12/2021	2	3	4	2	3	1	1	1	4	2	1	18
141	2022-02-16 13:52:00	21	2	1	2	11/2020	2	3	4	3	2	1	2	*	4	2	2	18
143	2022-02-17 10:20:00	22	2	1	3	11/2020	2	3	4	3	3	1	1	1	4	1	1	19
144	2022-02-17 11:47:00	24	2	1	2	4/2018	2	3	2	2	3	1	2	*	4	2	1	21
145	2022-02-17 14:23:00	21	1	1	2	11/2020	2	4	3	3	2	1	2	*	4	1	1	20
146	2022-02-21 09:42:00	20	1	1	2	11/2020	2	3	3	3	1	1	1	2	4	1	1	17
147	2022-02-21 09:55:00	21	1	1	2	12/2020	2	3	3	3	3	1	1	2	7	1	2	19
149	2022-02-21 11:55:00	20	1	1	2	3/2020	2	3	3	3	3	1	1	1	4	1	2	17
150	2022-02-21 11:56:00	25	1	1	2	11/2021	2	5	3	2	1	1	2	*	4	1	2	17
151	2022-02-21 11:56:00	20	2	1	2	3/2020	2	3	2	3	2	1	1	2	4	1	1	19
152	2022-02-21 11:58:00	27	1	1	2	11/2020	1	4	3	3	2	1	1	2	4	1	1	21
153	2022-02-21 11:58:00	21	1	1	2	11/2020	2	3	3	3	2	1	1	2	4	1	1	19
154	2022-02-21 11:58:00	24	2	1	2	3/2020	2	5	2	3	2	1	1	2	4	1	1	17
155	2022-02-21 11:59:00	25	2	1	2	3/2020	2	5	3	3	3	1	1	2	4	1	1	19
156	2022-02-21 11:59:00	20	2	1	2	3/2020	2	3	4	3	3	1	1	2	4	2	1	10
157	2022-02-22 12:04:00	27	1	1	2	11/2020	2	5	3	2	2	1	1	1	4	1	1	19
158	2022-02-22 12:07:00	24	2	1	2	11/2020	2	5	3	2	2	1	1	2	4	3	1	15
159	2022-02-22 12:09:00	24	1	1	2	11/2021	2	5	4	2	2	1	2	*	4	1	2	21
160	2022-02-22 12:09:00	21	1	1	2	3/2020	2	3	3	3	2	1	1	2	4	2	1	15
161	2022-02-22 12:09:00	24	1	1	2	12/2020	2	5	3	2	1	1	2	*	4	1	1	20
162	2022-02-22 12:12:00	21	1	1	2	3/2020	2	3	4	3	1	1	2	*	4	1	1	19
163	2022-02-22 12:31:00	21	1	1	2	3/2020	2	3	5	3	2	1	1	2	4	1	2	17
164	2022-02-25 09:45:00	30	1	1	2	12/2020	2	3	2	3	2	1	1	1	4	2	1	19
166	2022-02-25 12:01:00	23	1	1	2	12/2020	2	3	3	3	1	1	2	*	4	1	2	17
167	2022-02-25 12:03:00	21	1	1	2	11/2020	2	1	3	3	2	1	1	2	4	1	2	17
168	2022-02-25 12:03:00	24	1	1	2	12/2020	2	3	4	3	2	1	1	2	4	1	1	19
169	2022-02-25 12:04:00	20	1	1	2	12/2020	2	3	2	3	3	1	1	2	4	2	1	21
170	2022-02-25 12:16:00	25	1	1	2	12/2021	2	5	3	1	3	1	1	2	4	1	1	19
171	2022-02-25 12:20:00	20	1	1	2	11/2019	2	3	5	2	3	1	1	1	8	1	1	17
172	2022-02-25 12:21:00	22	1	1	2	11/2020	2	3	3	2	2	1	2	*	4	1	2	19
173	2022-02-25 15:22:00	20	1	1	2	4/2020	2	3	4	3	2	1	1	2	7	3	2	10
1	2022-02-03 15:31:00	24	2	2	1	1/2021	2	1	4	2	1	2	2	*	4	2	1	20
2	2022-02-04 13:51:00	26	1	2	2	12/2020	1	3	3	3	4	2	1	2	4	3	1	14
4	2022-02-04 16:44:00	21	1	2	1	12/2020	2	3	3	2	2	1	1	1	4	2	1	16
5	2022-02-04 17:50:00	23	1	2	2	12/2020	2	3	3	2	2	2	2	*	7	3	1	19
6	2022-02-04 18:05:00	22	1	2	2	12/2020	2	4	3	2	2	1	1	2	3	2	2	15
7	2022-02-04 18:21:00	21	1	2	2	12/2020	2	3	4	2	3	1	2	*	4	2	2	15
8	2022-02-05 20:20:00	24	1	2	2	12/2020	2	4	3	2	2	1	1	2	6	3	1	10
9	2022-02-08 07:39:00	28	1	2	1	12/2020	2	5	3	2	2	1	2	*	4	3	1	17
10	2022-02-08 21:49:00	21	1	2	2	12/2020	2	3	3	2	1	1	2	*	4	3	1	15
11	2022-02-09 12:07:00	20	1	2	4	11/2020	2	3	3	2	3	1	1	2	6	1	1	15
12	2022-02-09 12:11:00	22	2	2	1	11/2020	2	4	4	2	3	1	2	*	4	3	1	19
13	2022-02-09 17:21:00	22	1	2	2	12/2021	2	2	3	3	3	1	1	2	4	3	1	16
14	2022-02-09 20:47:00	20	2	2	1	12/2020	2	3	3	3	2	1	1	2	1	1	1	17
16	2022-02-10 11:59:00	24	2	2	2	1/2021	1	3	4	3	1	1	1	1	4	1	1	15
18	2022-02-10 14:19:00	30	1	2	2	1/2021	1	5	3	2	3	1	1	1	4	1	1	14
20	2022-02-10 14:53:00	27	2	2	2	12/2021	2	5	3	3	2	2	2	*	4	2	1	18
21	2022-02-10 14:56:00	23	2	2	2	12/2020	1	3	4	3	1	1	2	*	7	1	1	14
22	2022-02-10 14:58:00	19	2	2	2	12/2021	2	3	4	3	2	1	2	*	6	1	1	14
23	2022-02-10 15:07:00	28	2	2	2	1/2021	1	4	4	3	3	2	1	2	4	1	1	18
24	2022-02-10 15:08:00	24	2	2	2	12/2020	2	3	4	3	3	1	2	*	4	1	1	16
25	2022-02-13 19:45:00	21	1	2	4	12/2021	2	3	3	2	3	2	1	1	4	1	1	12
27	2022-02-14 15:31:00	23	2	2	2	12/2020	2	4	5	2	2	1	2	*	4	1	1	13
28	2022-02-14 15:35:00	23	1	2	2	12/2020	2	3	3	3	2	1	1	2	7	1	1	16
29	2022-02-14 16:05:00	22	1	2	2	12/2020	2	1	3	3	1	1	2	*	4	1	1	19
30	2022-02-14 16:34:00	21	1	2	2	12/2020	2	3	3	2	1	1	2	*	4	3	2	17
31	2022-02-14 19:25:00	21	1	2	2	11/2020	2	3	3	3	2	1	2	*	7	1	2	12
32	2022-02-14 22:21:00	28	2	2	4	11/2020	2	5	4	2	3	1	1	2	4	1	2	20
33	2022-02-15 11:14:00	21	2	2	1	12/2020	2	3	3	2	3	1	2	*	4	3	1	18
34	2022-02-15 12:04:00	27	2	2	1	12/2020	2	5	3	2	2	1	2	*	7	2	1	17
35	2022-02-15 12:36:00	25	2	2	1	12/2020	2	5	3	2	2	1	2	*	7	3	1	19
36	2022-02-15 12:36:00	19	1	2	1	12/2020	2	3	3	2	1	1	1	1	7	1	1	7
38	2022-02-18 12:08:00	26	1	2	2	12/2020	2	4	3	2	2	1	2	*	4	3	1	12
39	2022-02-21 16:56:00	21	2	2	2	12/2020	2	3	3	2	2	1	2	*	4	1	1	17

## Sheet: variable rist
variable name	content	1	2	3	4	5	6	7	8
ID		not appricable
answer date		not appricable
age		not appricable
sex		male	female	others
country		Vietnam	Nepal
area	residential area	Aichi	Shizuoka	Gifu	Mie
arrival month in Japan		not appricable
marital status		married	not married
educational level		junior high school graduate	high school dropout	high school graduate	university dropout	university graduate or above
japanese proficiency		N1	N2	N3	N4	N5
monthly income		<50,000 yen	50,000 yen-100,000 yen	100,000 yen-150,000 yen	150,000 yen-200,000 yen	200,000 yen≦
self-rated health		Excellent	Very good	Good	Bad	Very bad
health insurance		Yes	No
had hoped to see a doctor		Yes	No
unmet healthcare needs	Had hoped to have seen a doctor, but were not able to	Yes	No
social media	The channel to find out information of COVID-19	LINE	Zalo	Twitter	Facebook	Whatsapp	Instagram	YouTube	others
social media credibility	Determine if the information about COVID-19 on social media is correct	Yes	No	Not sure
poster	Having seen the poster issued by a local government	Yes	No
knowledge score		not appricable
